# Supplementary material for: Low Magnesium in Conjunction with High Homocysteine and Less Sleep Accelerates Telomere Attrition in Healthy Elderly Australian
Source: MDPI journal article supplement (doi:10.3390/ijms24020982), 2023-01-04
Supplement: s1 [file s1]

Supplementary Figure S1: Bivariate analysis of Homocysteine and Magnesium.

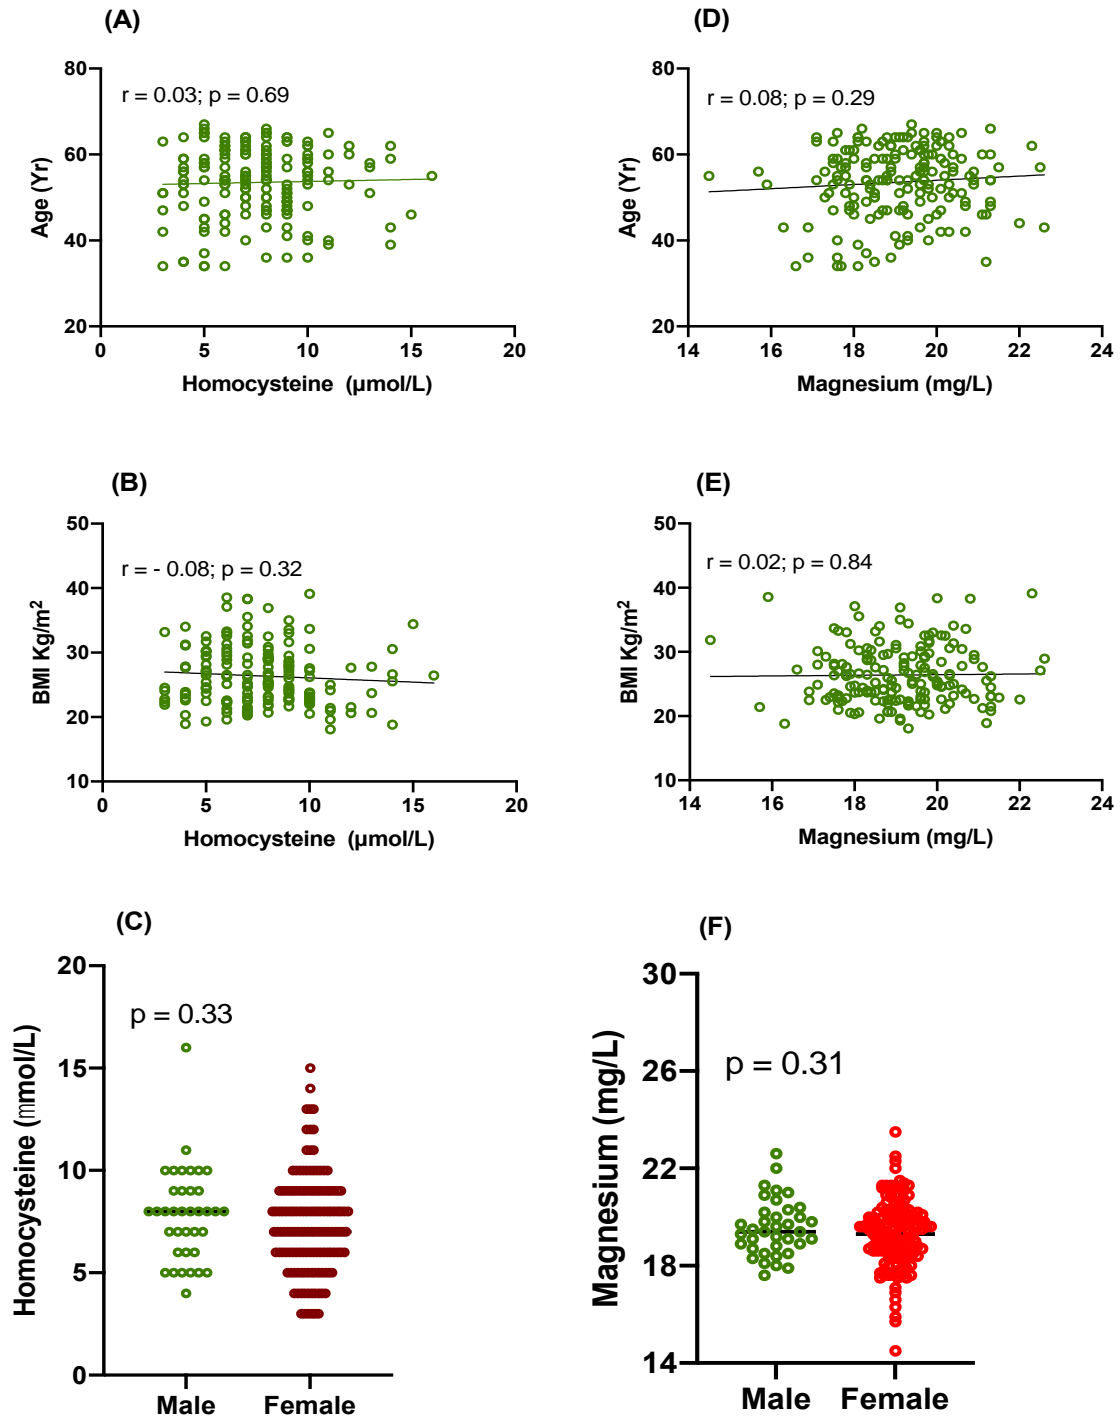

(A) The correlation of homocysteine with Age; (B) correlation of homocysteine with BMI; (C) homocysteine concentration in males and females; (D) correlation of magnesium with age; (E) correlation of magnesium with BMI; and (F) magnesium concentration in males and females.
